# Supplementary material for: Analyzing Kinase Similarity in Small Molecule and Protein Structural Space to Explore the Limits of Multi-Target Screening
Source: PubMed Central journal article supplement (PMC7865522; doi:10.3390/molecules26030629), 2021-01-26
Supplement: molecules-26-00629-s001.pdf [file molecules-26-00629-s001.pdf]

# Supplementary Materials: Analyzing kinase similarity in small molecule and protein structural space to explore the limits of multi-target screening

Denis Schmidt<sup>1</sup>, Magdalena M. Scharf<sup>1</sup>, Dominique Sydow<sup>1</sup>, Eva Aßmann, Maria Martí-Solano, Marina Keul, Andrea Volkamer<sup>1</sup> and Peter Kolb<sup>1</sup>

## 1. Supplementary Methods

### 1.1. DiscoverX kinase assay

For most assays, kinase-tagged T7 phage strains were grown in parallel in 24-well blocks in an *E.coli* host derived from the BL21 strain. *E.coli* were grown to log-phase and infected with T7 phage from a frozen stock (multiplicity of infection = 0.4) and incubated with shaking at 32°C until lysis (90-150 minutes). The lysates were centrifuged (6,000 × g) and filtered (0.2 μm) to remove cell debris. The remaining kinases were produced in HEK-293 cells and subsequently tagged with DNA for qPCR detection. Streptavidin-coated magnetic beads were treated with biotinylated small molecule ligands for 30 minutes at room temperature to generate affinity resins for the kinases. The liganded beads were blocked with excess biotin and washed with blocking buffer (SeaBlock [Pierce], 1% BSA, 0.05% Tween 20, 1 mM DTT) to remove unbound ligands and to reduce non-specific phage binding. Binding reactions were assembled by combining kinases, liganded affinity beads, and test compounds in 1x binding buffer (20% SeaBlock, 0.17x PBS, 0.05% Tween 20, 6 mM DTT). Test compounds were prepared as 40x stocks in 100% DMSO and directly diluted into the assay. All reactions were performed in polypropylene 384-well plates in a final volume of 0.02 ml. The assay plates were incubated at room temperature with shaking for 1 hour and the affinity beads were washed with wash buffer (1x PBS, 0.05% Tween 20). The beads were then re-suspended in elution buffer (1x PBS, 0.05% Tween 20, 0.5 μM non-biotinylated affinity ligand) and incubated at room temperature with shaking for 30 minutes. The kinase concentration in the eluates was measured by qPCR.

## 2. Supplementary Figures

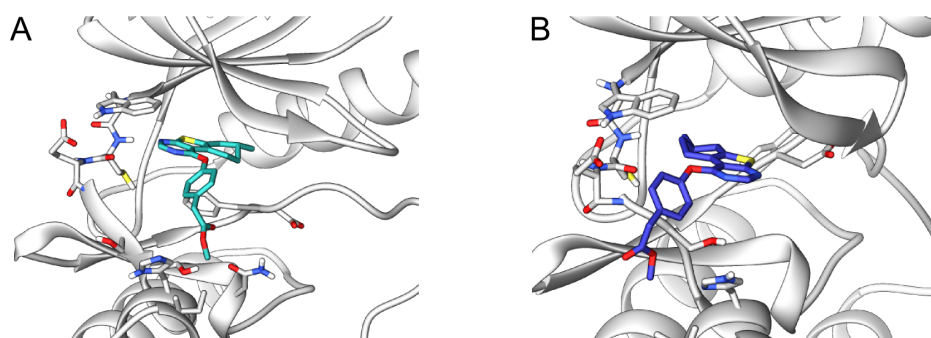

**Figure S1.** Structure of ligand DS39984 bound to the BRAF structures PDB 1UWH, DFG-out (A) and PDB 3PPK, DFG-in (B). The protein structure is shown as cartoon, colored in grey. The compound and interacting binding site residues are represented as sticks.

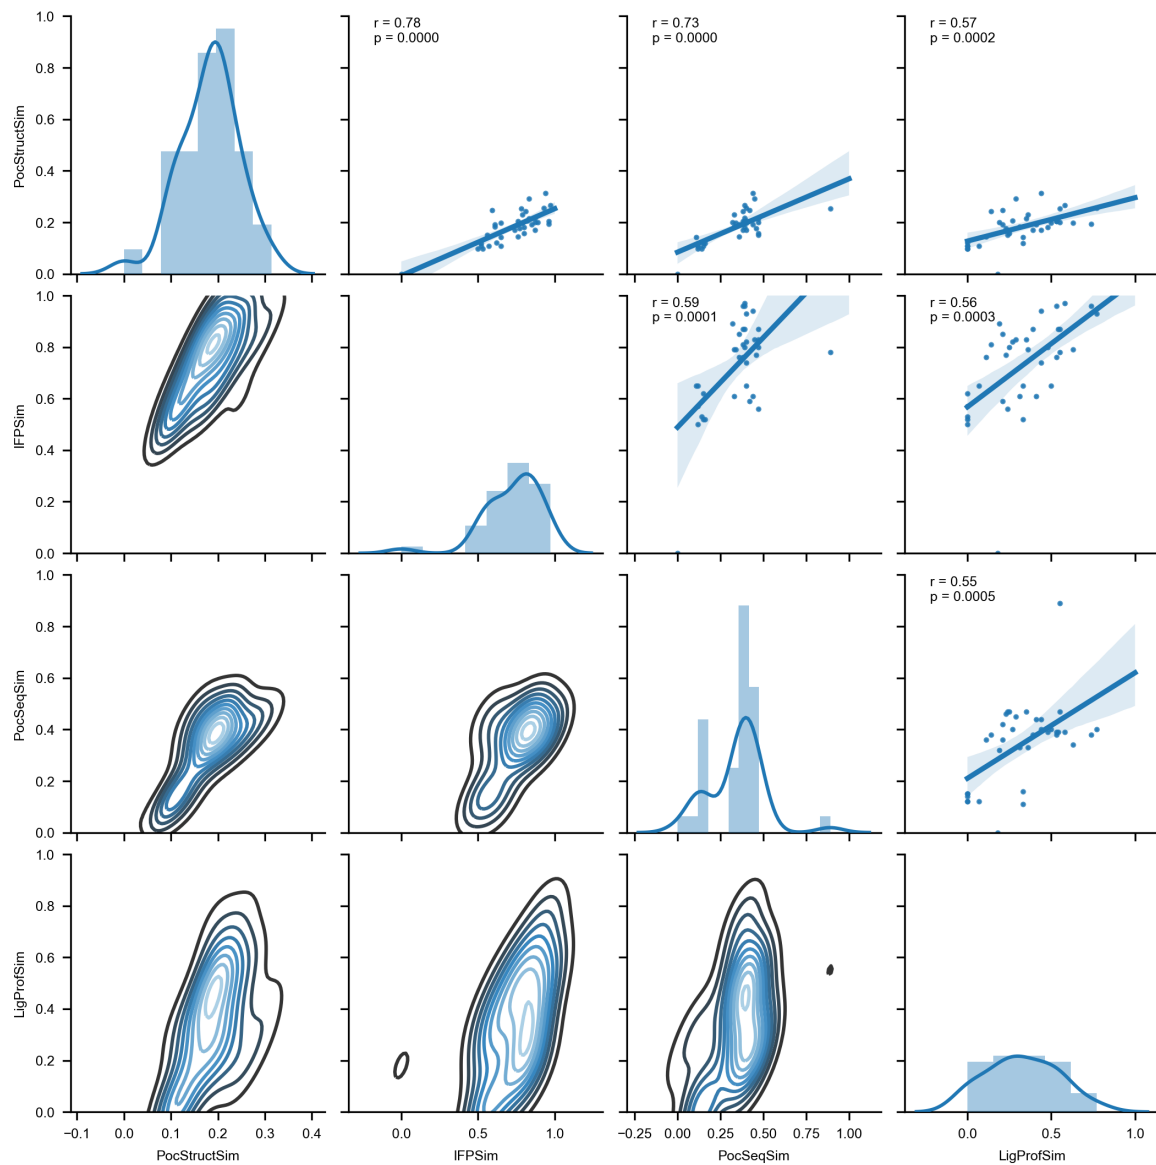

**Figure S2.** Comparison of different similarity measures for pairwise kinase structure comparisons. Diagonal: Distributions of structure similarities for the herein described similarity measures. Lower triangular matrix: Bivariate distributions of similarities per pairs of similarity measures, shown as isocontours with light blue indicating high densities and dark blue indicating low densities. Upper triangular matrix: Scatter plots of similarities per pairs of similarity measures with fitted regression lines (dark lines) and 95% CI intervals of regression (light blue shades)

### 3. Supplementary Tables

#### 3.1. Compound lists and experimental results

**Table S1.** IDs and 2D depictions of all compounds tested in the different kinase assays as well as the docking profile they were selected from. Three compounds were selected independently from two different profiles and are marked accordingly.

| Mol ID               | ZINC ID   | 2D structure                                                                        | Profile          |
|----------------------|-----------|-------------------------------------------------------------------------------------|------------------|
| <b>Actives</b>       |           |                                                                                     |                  |
| DS39984              | C03283998 | 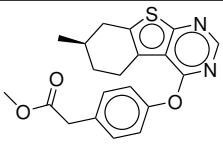   | +EGFR+ErbB2-BRAF |
| K001MM011            | C32808493 |    | +VEGFR2          |
| <b>Inactives</b>     |           |                                                                                     |                  |
| DS04644              | C84640464 |  | +EGFR+ErbB2-BRAF |
| DS05168              | C04940516 |  | +EGFR+ErbB2-BRAF |
| DS18339              | C71281833 |  | +EGFR+ErbB2-BRAF |
| DS34376              | C95373437 |  | +EGFR+ErbB2-BRAF |
| DS44245              | C47934424 |  | +EGFR+ErbB2-BRAF |
| DS44738 <sup>b</sup> | C48954473 |  | +EGFR+ErbB2-BRAF |

|         |           |                                                                                     |                  |
|---------|-----------|-------------------------------------------------------------------------------------|------------------|
| DS57124 | C17055712 | 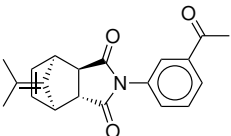   | +EGFR+ErbB2-BRAF |
| DS59212 | C09205921 |    | +EGFR+ErbB2-BRAF |
| DS72975 | C06807297 |    | +EGFR+ErbB2-BRAF |
| DS74417 | C95387441 |    | +EGFR+ErbB2-BRAF |
| DS75739 | C48697573 |   | +EGFR+ErbB2-BRAF |
| DS76514 | C00137651 |  | +EGFR+ErbB2-BRAF |
| DS84326 | C20858432 |  | +EGFR+ErbB2-BRAF |
| DS99367 | C71899936 |  | +EGFR+ErbB2-BRAF |
| DS23815 | C71422381 |  | +EGFR+PI3K-BRAF  |
| DS31939 | C02343193 |  | +EGFR+PI3K-BRAF  |

|                      |           |                                                                                     |                                      |
|----------------------|-----------|-------------------------------------------------------------------------------------|--------------------------------------|
| DS52225              | C44425222 | 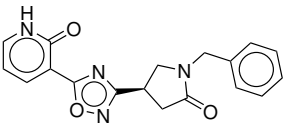   | +EGFR+PI3K-BRAF                      |
| DS62156              | C08706215 |    | +EGFR+PI3K-BRAF                      |
| DS74631              | C07397463 |    | +EGFR+PI3K-BRAF                      |
| DS82066              | C02228206 |    | +EGFR+PI3K-BRAF                      |
| DS11689 <sup>a</sup> | C02341168 |   | +EGFR+PI3K-BRAF/<br>+EGFR+ErbB2-BRAF |
| DS66846 <sup>a</sup> | C02226684 |  | +EGFR+PI3K-BRAF/<br>+EGFR+ErbB2-BRAF |
| DS74871 <sup>a</sup> | C07397487 |  | +EGFR+PI3K-BRAF/<br>+EGFR+ErbB2-BRAF |
| K001MM002            | C97100024 |  | +EGFR+VEGFR2-BRAF                    |
| K001MM003            | C04266692 |  | +EGFR+VEGFR2-BRAF                    |
| K001MM004            | C48922370 |  | +EGFR+VEGFR2-BRAF                    |

|                        |           |  |                   |
|------------------------|-----------|--|-------------------|
| K001MM005              | C76064467 |  | +EGFR+VEGFR2-BRAF |
| K001MM006              | C96153842 |  | +EGFR+VEGFR2-BRAF |
| K001MM007              | C97142813 |  | +EGFR+VEGFR2-BRAF |
| K001MM008              | C40067740 |  | +EGFR+VEGFR2-BRAF |
| K001MM009 <sup>b</sup> | C48954473 |  | +EGFR+VEGFR2-BRAF |
| K001MM010              | C96160364 |  | +VEGFR2           |
| K001MM012              | C03453350 |  | +VEGFR2           |
| K001MM013              | C23551796 |  | +VEGFR2           |

<sup>a</sup> Compounds were selected independently from docking campaigns against two profiles.

<sup>b</sup> Compound was selected independently from two docking profiles and tested twice in separate test rounds during experimental validation.

**Table S2.** Experimental % control values from the DiscoverX kinase assay. Compounds were tested against the nine kinases EGFR, ErbB2, LCK, CDK2, BRAF, MET, p38 $\alpha$ , PI3K and VEGFR2, unless otherwise stated. Binding of kinase and compound were tested at a compound concentration of 10  $\mu$ M and in comparison to a control compound. Lower values indicate a higher affinity of the compound to the protein and values below 35% indicate significant binding according to information of the CRO.

| Mol ID                   | ZINC ID   | BRAF | EGFR | ErbB2 | VEGFR2 | CDK2 | LCK  | MET  | p38 $\alpha$ | PI3K |
|--------------------------|-----------|------|------|-------|--------|------|------|------|--------------|------|
| Actives                  |           |      |      |       |        |      |      |      |              |      |
| DS39984                  | C03283998 | 99   | 17   | 21    | 99     | 100  | 89   | 100  | 100          | 100  |
| K001MM011 <sup>a</sup>   | C32808493 | 100  | 1.4  | 53    | 99     | n.t. | n.t. | n.t. | n.t.         | n.t. |
| Inactives                |           |      |      |       |        |      |      |      |              |      |
| DS04644                  | C84640464 | 97   | 100  | 100   | 100    | 99   | 96   | 100  | 100          | 100  |
| DS05168                  | C04940516 | 98   | 100  | 100   | 100    | 99   | 95   | 94   | 100          | 100  |
| DS18339                  | C71281833 | 100  | 97   | 100   | 97     | 100  | 89   | 100  | 99           | 100  |
| DS34376                  | C95373437 | 92   | 90   | 100   | 100    | 99   | 100  | 100  | 100          | 100  |
| DS44245                  | C47934424 | 99   | 100  | 100   | 98     | 100  | 100  | 90   | 100          | 100  |
| DS44738 <sup>b</sup>     | C48954473 | 100  | 100  | 91    | 100    | 100  | 100  | 84   | 100          | 94   |
| DS57124                  | C17055712 | 100  | 100  | 91    | 100    | 100  | 100  | 94   | 100          | 100  |
| DS59212                  | C09205921 | 100  | 100  | 100   | 100    | 100  | 100  | 97   | 99           | 87   |
| DS72975                  | C06807297 | 100  | 96   | 87    | 99     | 100  | 100  | 78   | 100          | 100  |
| DS74417                  | C95387441 | 86   | 89   | 100   | 100    | 100  | 100  | 100  | 100          | 97   |
| DS75739                  | C48697573 | 100  | 100  | 94    | 100    | 100  | 100  | 85   | 87           | 100  |
| DS76514                  | C00137651 | 89   | 87   | 96    | 100    | 100  | 100  | 90   | 97           | 100  |
| DS84326                  | C20858432 | 100  | 100  | 97    | 100    | 100  | 100  | 95   | 90           | 100  |
| DS99367                  | C71899936 | 100  | 93   | 100   | 100    | 100  | 100  | 87   | 91           | 100  |
| DS23815                  | C71422381 | 99   | 100  | 100   | 100    | 99   | 100  | 99   | 100          | 97   |
| DS31939                  | C02343193 | 100  | 100  | 100   | 100    | 100  | 99   | 100  | 100          | 73   |
| DS52225                  | C44425222 | 100  | 100  | 94    | 98     | 100  | 100  | 91   | 100          | 100  |
| DS62156                  | C08706215 | 95   | 90   | 96    | 100    | 100  | 100  | 87   | 97           | 66   |
| DS74631                  | C07397463 | 100  | 97   | 95    | 100    | 100  | 87   | 100  | 83           | 100  |
| DS82066                  | C02228206 | 83   | 92   | 90    | 100    | 100  | 100  | 100  | 93           | 89   |
| DS11689                  | C02341168 | 88   | 100  | 99    | 100    | 100  | 100  | 99   | 100          | 99   |
| DS66846                  | C02226684 | 100  | 100  | 96    | 100    | 100  | 100  | 92   | 100          | 100  |
| DS74871                  | C07397487 | 100  | 100  | 100   | 100    | 100  | 90   | 95   | 81           | 100  |
| K001MM002 <sup>a</sup>   | C97100024 | 89   | 97   | 92    | 100    | n.t. | n.t. | n.t. | n.t.         | n.t. |
| K001MM003 <sup>a</sup>   | C04266692 | 95   | 99   | 99    | 100    | n.t. | n.t. | n.t. | n.t.         | n.t. |
| K001MM004 <sup>a</sup>   | C48922370 | 100  | 100  | 100   | 100    | n.t. | n.t. | n.t. | n.t.         | n.t. |
| K001MM005 <sup>a</sup>   | C76064467 | 99   | 100  | 100   | 100    | n.t. | n.t. | n.t. | n.t.         | n.t. |
| K001MM006 <sup>a</sup>   | C96153842 | 100  | 96   | 100   | 100    | n.t. | n.t. | n.t. | n.t.         | n.t. |
| K001MM007 <sup>a</sup>   | C97142813 | 87   | 90   | 94    | 100    | n.t. | n.t. | n.t. | n.t.         | n.t. |
| K001MM008 <sup>a</sup>   | C40067740 | 100  | 100  | 100   | 100    | n.t. | n.t. | n.t. | n.t.         | n.t. |
| K001MM009 <sup>a,b</sup> | C48954473 | 96   | 100  | 98    | 98     | n.t. | n.t. | n.t. | n.t.         | n.t. |
| K001MM010 <sup>a</sup>   | C96160364 | 100  | 95   | 90    | 97     | n.t. | n.t. | n.t. | n.t.         | n.t. |
| K001MM012 <sup>a</sup>   | C03453350 | 100  | 90   | 100   | 91     | n.t. | n.t. | n.t. | n.t.         | n.t. |
| K001MM013 <sup>a</sup>   | C23551796 | 100  | 100  | 94    | 90     | n.t. | n.t. | n.t. | n.t.         | n.t. |

<sup>a</sup> Compounds were only tested against four kinases (EGFR, ErbB2, BRAF and VEGFR2).

<sup>b</sup> Compound was selected independently from two docking profiles and tested separately during experimental validation.

n.t.: not tested.

**Table S3.** Experimental results from the Eurofins assay. Inhibition of four kinases (EGFR, PI3K, ErbB2, BRAF) was measured at compound concentrations of 20  $\mu$ M. Inhibition was calculated as % inhibition of control activity. According to CRO, values above 50% inhibition represent significant inhibition, values above 25% weak inhibition effect and values below 25% as well as negative values are usually not significant. Results are reported in *mean (SD)* format.

| Mol ID           | ZINC ID   | EGFR        | PI3K                    | ErbB2       | BRAF         |
|------------------|-----------|-------------|-------------------------|-------------|--------------|
| <b>Actives</b>   |           |             |                         |             |              |
| DS39984          | C03283998 | 58.9 (3.2)  | -6.7 (2.3)              | -1.3 (1.8)  | -0.1 (0.1)   |
| <b>Inactives</b> |           |             |                         |             |              |
| DS04644          | C84640464 | 3.4 (1.8)   | -2.8 (0.6)              | -7.4 (1.0)  | -14.7 (7.4)  |
| DS05168          | C04940516 | 11.1 (1.8)  | -1 (1.6)                | 2.8 (1.6)   | -12.4 (10.9) |
| DS18339          | C71281833 | 15.3 (7.7)  | -3.7 (0.3)              | 0.7 (1.1)   | -21.8 (9.5)  |
| DS34376          | C95373437 | 16.1 (7.5)  | -2 (0.8)                | -1.6 (1.9)  | -11.3 (4.2)  |
| DS44245          | C47934424 | 2.4 (14.7)  | 1.8 (4.4)               | -3.4 (1.0)  | -13.7 (10.5) |
| DS44738          | C48954473 | 4.4 (14.0)  | 0.4 (1.7)               | 10.5 (23.6) | -20.8 (0.4)  |
| DS57124          | C17055712 | 23.9 (7.5)  | 7.8 (5.0)               | -3 (1.8)    | -20.2 (19.8) |
| DS59212          | C09205921 | 7.8 (3.3)   | 0.2 (3.6)               | 5.8 (0.2)   | -22.9 (4.9)  |
| DS72975          | C06807297 | 19.8 (5.0)  | -1.1 (2.1)              | 9.8 (21.9)  | -12.4 (1.8)  |
| DS74417          | C95387441 | 18 (3.2)    | 2.1 (0.4)               | -2.8 (0.7)  | -0.3 (1.6)   |
| DS75739          | C48697573 | 4.3 (6.9)   | 1.7 (0.8)               | -0.6 (1.1)  | -11.1 (4.9)  |
| DS76514          | C00137651 | 3.2 (10.7)  | 17.4 (0.4)              | -0.6 (1.0)  | -33.6 (18.1) |
| DS84326          | C20858432 | 23.4 (0.6)  | 0.7 (0.8)               | 0.2 (2.8)   | -8.2 (13.6)  |
| DS99367          | C71899936 | 17.3 (0.1)  | 1.4 (0.1)               | -3.3 (0.5)  | -19.6 (11.8) |
| DS23815          | C71422381 | 10.7 (0.4)  | -4.7 (3.1) <sup>a</sup> | -7.2 (5.7)  | -19.7 (2.4)  |
| DS31939          | C02343193 | 9.6 (0.2)   | -9.8 (7.8) <sup>a</sup> | -1.7 (0.8)  | -27.8 (10.8) |
| DS52225          | C44425222 | 22.7 (15.5) | 0.9 (3.6)               | 4.5 (4.9)   | -17.7 (15.6) |
| DS62156          | C08706215 | 16.6 (0.4)  | 1.5 (5.8)               | 3.1 (3.3)   | -6.3 (1.6)   |
| DS74631          | C07397463 | 11.3 (4.5)  | 20 (5.2)                | -4.6 (2.9)  | -22.8 (15.9) |
| DS82066          | C02228206 | 12.6 (1.9)  | 3.6 (2.3)               | -1.4 (0.8)  | -18.5 (1.8)  |
| DS11689          | C02341168 | 18.1 (7.9)  | -0.2 (0.4)              | 0.1 (2.1)   | -8.3 (20.8)  |
| DS66846          | C02226684 | 14.5 (8.6)  | 4.6 (7.7)               | -2.5 (1.6)  | -18.7 (11.9) |
| DS74871          | C07397487 | 23.3 (4.2)  | 22.1 (2.3)              | -8.3 (1.2)  | -44.9 (24.1) |

<sup>a</sup> Compound interfered with assay readout.



## 3.2. Raw data for LigProfSim, PocSeqSim, IFPSim, and PocStructSim

## 3.2.1. LigProfSim

**Table S4.** LigProfSim matrix: Similarity values per kinase pair

| kinase | EGFR | ErbB2 | BRAF | CDK2 | LCK  | MET  | p38a | KDR  | p110a |
|--------|------|-------|------|------|------|------|------|------|-------|
| EGFR   | 0.59 | 0.55  | 0.53 | 0.19 | 0.29 | 0.23 | 0.48 | 0.35 | 0.07  |
| ErbB2  | 0.55 | 0.62  | 0.50 | 0.31 | 0.21 | 0.24 | 0.44 | 0.41 | 0.00  |
| BRAF   | 0.53 | 0.50  | 0.82 | 0.36 | 0.58 | 0.39 | 0.74 | 0.77 | 0.33  |
| CDK2   | 0.19 | 0.31  | 0.36 | 0.55 | 0.14 | 0.21 | 0.25 | 0.63 | 0.33  |
| LCK    | 0.29 | 0.21  | 0.58 | 0.14 | 0.63 | 0.27 | 0.54 | 0.44 | 0.00  |
| MET    | 0.23 | 0.24  | 0.39 | 0.21 | 0.27 | 0.79 | 0.11 | 0.55 | 0.00  |
| p38a   | 0.48 | 0.44  | 0.74 | 0.25 | 0.54 | 0.11 | 0.77 | 0.53 | 0.00  |
| KDR    | 0.35 | 0.41  | 0.77 | 0.63 | 0.44 | 0.55 | 0.53 | 0.70 | 0.18  |
| p110a  | 0.07 | 0.00  | 0.33 | 0.33 | 0.00 | 0.00 | 0.00 | 0.18 | 0.65  |

**Table S5.** LigProfSim counts: Number of ChEMBL compounds commonly tested in each kinase pair

| kinase | EGFR | ErbB2 | BRAF | CDK2 | LCK  | MET  | p38a | KDR  | p110a |
|--------|------|-------|------|------|------|------|------|------|-------|
| EGFR   | 5702 | 1199  | 70   | 47   | 129  | 82   | 46   | 875  | 180   |
| ErbB2  | 1199 | 1690  | 22   | 29   | 28   | 29   | 9    | 189  | 1     |
| BRAF   | 70   | 22    | 3625 | 14   | 38   | 31   | 42   | 268  | 3     |
| CDK2   | 47   | 29    | 14   | 1520 | 22   | 24   | 8    | 122  | 12    |
| LCK    | 129  | 28    | 38   | 22   | 1552 | 66   | 136  | 419  | 5     |
| MET    | 82   | 29    | 31   | 24   | 66   | 2851 | 18   | 348  | 2     |
| p38a   | 46   | 9     | 42   | 8    | 136  | 18   | 3581 | 125  | 5     |
| KDR    | 875  | 189   | 268  | 122  | 419  | 348  | 125  | 7426 | 175   |
| p110a  | 180  | 1     | 3    | 12   | 5    | 2    | 5    | 175  | 4150  |

**Table S6.** LigProfSim common actives: Number of ChEMBL compounds commonly active in each kinase pair

| kinase | EGFR | ErbB2 | BRAF | CDK2 | LCK | MET  | p38a | KDR  | p110a |
|--------|------|-------|------|------|-----|------|------|------|-------|
| EGFR   | 3382 | 658   | 37   | 9    | 38  | 19   | 22   | 303  | 13    |
| ErbB2  | 658  | 1048  | 11   | 9    | 6   | 7    | 4    | 77   | 0     |
| BRAF   | 37   | 11    | 2968 | 5    | 22  | 12   | 31   | 207  | 1     |
| CDK2   | 9    | 9     | 5    | 837  | 3   | 5    | 2    | 77   | 4     |
| LCK    | 38   | 6     | 22   | 3    | 976 | 18   | 73   | 183  | 0     |
| MET    | 19   | 7     | 12   | 5    | 18  | 2248 | 2    | 193  | 0     |
| p38a   | 22   | 4     | 31   | 2    | 73  | 2    | 2753 | 66   | 0     |
| KDR    | 303  | 77    | 207  | 77   | 183 | 193  | 66   | 5197 | 32    |
| p110a  | 13   | 0     | 1    | 4    | 0   | 0    | 0    | 32   | 2706  |

## 3.2.2. PocSeqSim

**Table S7.** Kinase sequence identity of binding site residues (MSA of 85 binding site residues from KLIFS)

| kinase | EGFR | ErbB2 | BRAF | CDK2 | LCK  | MET  | p38  | PI3K | VEGFR2 |
|--------|------|-------|------|------|------|------|------|------|--------|
| EGFR   | 1    | 0.89  | 0.38 | 0.32 | 0.45 | 0.46 | 0.39 | 0.12 | 0.47   |
| ErbB2  | 0.89 | 1     | 0.4  | 0.33 | 0.42 | 0.47 | 0.4  | 0.12 | 0.44   |
| BRAF   | 0.38 | 0.4   | 1    | 0.33 | 0.39 | 0.38 | 0.38 | 0.16 | 0.4    |
| CDK2   | 0.32 | 0.33  | 0.33 | 1    | 0.38 | 0.36 | 0.47 | 0.11 | 0.34   |
| LCK    | 0.45 | 0.42  | 0.39 | 0.38 | 1    | 0.4  | 0.39 | 0.15 | 0.44   |
| MET    | 0.46 | 0.47  | 0.38 | 0.36 | 0.4  | 1    | 0.36 | 0.12 | 0.47   |
| p38    | 0.39 | 0.4   | 0.38 | 0.47 | 0.39 | 0.36 | 1    | 0.14 | 0.39   |
| PI3K   | 0.12 | 0.12  | 0.16 | 0.11 | 0.15 | 0.12 | 0.14 | 1    | 0.15   |
| VEGFR2 | 0.47 | 0.44  | 0.4  | 0.34 | 0.44 | 0.47 | 0.39 | 0.15 | 1      |

## 3.2.3. IFPSim

**Table S8.** IFPSim matrix: Similarity values per kinase pair

| kinase1 | EGFR | ErbB2 | BRAF | CDK2 | LCK  | MET  | p38a | PI3K | VEGFR2 |
|---------|------|-------|------|------|------|------|------|------|--------|
| EGFR    | 1.0  | 0.78  | 0.76 | 0.89 | 0.83 | 0.77 | 0.8  | 0.65 | 0.83   |
| ErbB2   | 0.78 | 0.71  | 0.65 | 0.61 | 0.59 | 0.56 | 0.74 | 0.5  | 0.61   |
| BRAF    | 0.76 | 0.65  | 0.96 | 0.79 | 0.97 | 0.87 | 0.96 | 0.52 | 0.93   |
| CDK2    | 0.89 | 0.61  | 0.79 | 1.0  | 0.81 | 0.85 | 0.8  | 0.65 | 0.79   |
| LCK     | 0.83 | 0.59  | 0.97 | 0.81 | 0.91 | 0.82 | 0.87 | 0.62 | 0.94   |
| MET     | 0.77 | 0.56  | 0.87 | 0.85 | 0.82 | 1.0  | 0.76 | 0.57 | 0.87   |
| p38a    | 0.8  | 0.74  | 0.96 | 0.8  | 0.87 | 0.76 | 1.0  | 0.53 | 0.96   |
| PI3K    | 0.65 | 0.5   | 0.52 | 0.65 | 0.62 | 0.57 | 0.53 | 0.91 | 0.52   |
| VEGFR2  | 0.83 | 0.61  | 0.93 | 0.79 | 0.94 | 0.87 | 0.96 | 0.52 | 1.0    |

## 3.2.4. PocStructSim

**Table S9.** PocStructSim matrix: Similarity values per kinase pair

|        | EGFR  | ErbB2 | VEGFR2 | PI3K  | BRAF  | CDK2  | LCK   | MET   | p38a  |
|--------|-------|-------|--------|-------|-------|-------|-------|-------|-------|
| EGFR   | 1.000 | 0.400 | 0.478  | 0.241 | 0.518 | 0.500 | 0.534 | 0.451 | 0.466 |
| ErbB2  | 0.400 | 1.000 | 0.291  | 0.164 | 0.318 | 0.300 | 0.373 | 0.279 | 0.259 |
| VEGFR2 | 0.478 | 0.291 | 1.000  | 0.290 | 0.607 | 0.427 | 0.615 | 0.435 | 0.565 |
| PI3K   | 0.241 | 0.164 | 0.290  | 1.000 | 0.259 | 0.282 | 0.225 | 0.242 | 0.322 |
| BRAF   | 0.518 | 0.318 | 0.607  | 0.259 | 1.000 | 0.589 | 0.491 | 0.409 | 0.522 |
| CDK2   | 0.500 | 0.300 | 0.427  | 0.282 | 0.589 | 1.000 | 0.456 | 0.460 | 0.433 |
| LCK    | 0.534 | 0.373 | 0.615  | 0.225 | 0.491 | 0.456 | 1.000 | 0.433 | 0.419 |
| MET    | 0.451 | 0.279 | 0.435  | 0.242 | 0.409 | 0.460 | 0.433 | 1.000 | 0.409 |
| p38a   | 0.466 | 0.259 | 0.565  | 0.322 | 0.522 | 0.433 | 0.419 | 0.409 | 1.000 |
